# Supplementary material for: Loss of EGFR-ASAP1 signaling in metastatic and unresectable hepatoblastoma
Source: PubMed Central journal article supplement (PMC5133573; doi:10.1038/srep38347), 2016-12-02
Supplement: srep38347-s1.pdf [file srep38347-s1.pdf]

Supplementary information title page:

**Loss of EGFR-ASAP1 signaling in metastatic and unresectable hepatoblastoma**

Sarangarajan Ranganathan<sup>2\*</sup>, Mylarappa Ningappa<sup>1\*</sup>, Chethan Ashokkumar<sup>1</sup>, Brandon W. Higgs<sup>1</sup>, Jun Min<sup>4</sup>, Qing Sun<sup>1</sup>, Lori Schmitt<sup>2</sup>, Shankar Subramaniam<sup>4</sup>, Hakon Hakonarson<sup>3</sup>, Rakesh Sindhi<sup>1\*</sup>

1. Supplementary Tables 1-5
